# Supplementary material
Source: PubMed Central journal article supplement (PMC3208743)

## Supporting Information to Manuscript

### Magic Angle Spinning NMR Based Metabolic Profiling of Head and Neck Squamous Cell Carcinoma Tissues

Bagganahalli S.Somashekar<sup>1#</sup>, Pachiyappan Kamarajan<sup>2#</sup>, Theodora Danciu<sup>2</sup>, Yvonne L. Kapila<sup>2</sup>,  
Arul M. Chinnaiyan<sup>3,4,5,6</sup>, Thekkelnaycke M. Rajendiran<sup>3</sup>, Ayyalusamy Ramamoorthy<sup>1,\*</sup>

<sup>1</sup>Department of Chemistry and Biophysics, <sup>2</sup>Department of Periodontics and Oral Medicine,  
School of Dentistry, University of Michigan, Ann Arbor, MI, USA. <sup>3</sup>Michigan Center for  
Translational Pathology, Department of Pathology, <sup>4</sup>Department of Urology, <sup>5</sup>Comprehensive  
Cancer Center, and <sup>6</sup>Howard Hughes Medical Institute, University of Michigan Medical School,  
Ann Arbor, MI, USA.

# Authors contributed equally.

\* Corresponding Author

Prof. Ayyalusamy Ramamoorthy  
Biophysics and Department of Chemistry  
University of Michigan  
930 North University Avenue  
Ann Arbor, Michigan 48109-1055, USA  
Phone: (734) 647-6572  
Fax: (734) 764-3323  
E-mail: [ramamoor@umich.edu](mailto:ramamoor@umich.edu)

**Table S1:** <sup>1</sup>H chemical shift of metabolites detected in the head and neck tissues.

| Metabolite            | Moiety                                                                                               | <sup>1</sup> H Chemical Shift (ppm)    |
|-----------------------|------------------------------------------------------------------------------------------------------|----------------------------------------|
| Acetate               | CH <sub>3</sub>                                                                                      | 1.92                                   |
| Alanine               | αCH; βCH <sub>3</sub>                                                                                | 3.77; 1.48                             |
| Aspartate             | αCH; βCH <sub>2</sub>                                                                                | 3.90; 2.82, 2.67                       |
| Choline               | N(CH <sub>3</sub> ) <sub>3</sub> ; αCH <sub>2</sub> ; βCH <sub>2</sub>                               | 3.19; 4.05, 3.51                       |
| Creatine              | N-CH <sub>3</sub> ; CH <sub>2</sub>                                                                  | 3.04; 3.93                             |
| Glutamate             | αCH; βCH <sub>2</sub> ; γCH <sub>2</sub>                                                             | 3.75; 2.09; 2.35                       |
| Glutamine             | αCH; βCH <sub>2</sub> ; γCH <sub>2</sub>                                                             | 3.78; 2.14; 2.44                       |
| Glutathione           | Glu (CH; CH <sub>2</sub> ; CH <sub>2</sub> )<br>Cys (CH; CH <sub>2</sub> )<br>Gly (CH <sub>2</sub> ) | 3.76; 2.16; 2.54<br>4.51; 3.01<br>3.77 |
| Glycerophosphocholine | N(CH <sub>3</sub> ) <sub>3</sub> ; OCH <sub>2</sub> ; NCH <sub>2</sub>                               | 3.22; 4.32; 3.68                       |
| Glycine               | CH <sub>2</sub>                                                                                      | 3.57                                   |
| Isoleucine            | αCH; βCH; γCH <sub>2</sub> ;<br>γCH <sub>3</sub> ; δCH <sub>3</sub>                                  | 3.65; 1.97; 1.26/1.47<br>1.02; 0.94    |
| Lactate               | αCH; βCH <sub>3</sub>                                                                                | 4.11; 1.33                             |
| Leucine               | αCH; βCH <sub>2</sub> ; γCH;<br>δCH <sub>3</sub> ; δCH <sub>3</sub>                                  | 3.73; 1.72; 1.70;<br>0.97; 0.95        |
| Phenylalanine         | αCH; βCH <sub>2</sub> ;<br>2,6-H; 3,5-H, 4H                                                          | 3.99; 3.11/3.28;<br>7.34; 7.44; 7.37   |
| Phosphocholine        | N(CH <sub>3</sub> ) <sub>3</sub> ; OCH <sub>2</sub> ; NCH <sub>2</sub>                               | 3.20; 4.16; 3.58                       |
| Taurine               | S-CH <sub>2</sub> ; N-CH <sub>2</sub>                                                                | 3.26; 3.42                             |
| Tyrosine              | αCH; βCH <sub>2</sub> ;<br>2,6-H; 3,5-H                                                              | 3.93; 3.06/3.20<br>7.23; 6.89          |
| Valine                | αCH; βCH;<br>γCH <sub>3</sub> ; γCH <sub>3</sub>                                                     | 3.61; 2.25;<br>1.04; 0.99              |

**Figure S1.** A comparison of NMR spectra of a tumor tissue with that of standard compounds to support the chemical shift assignments of isoleucine, leucine, valine, lactate, alanine, glutamate, glutamine and glutathione.

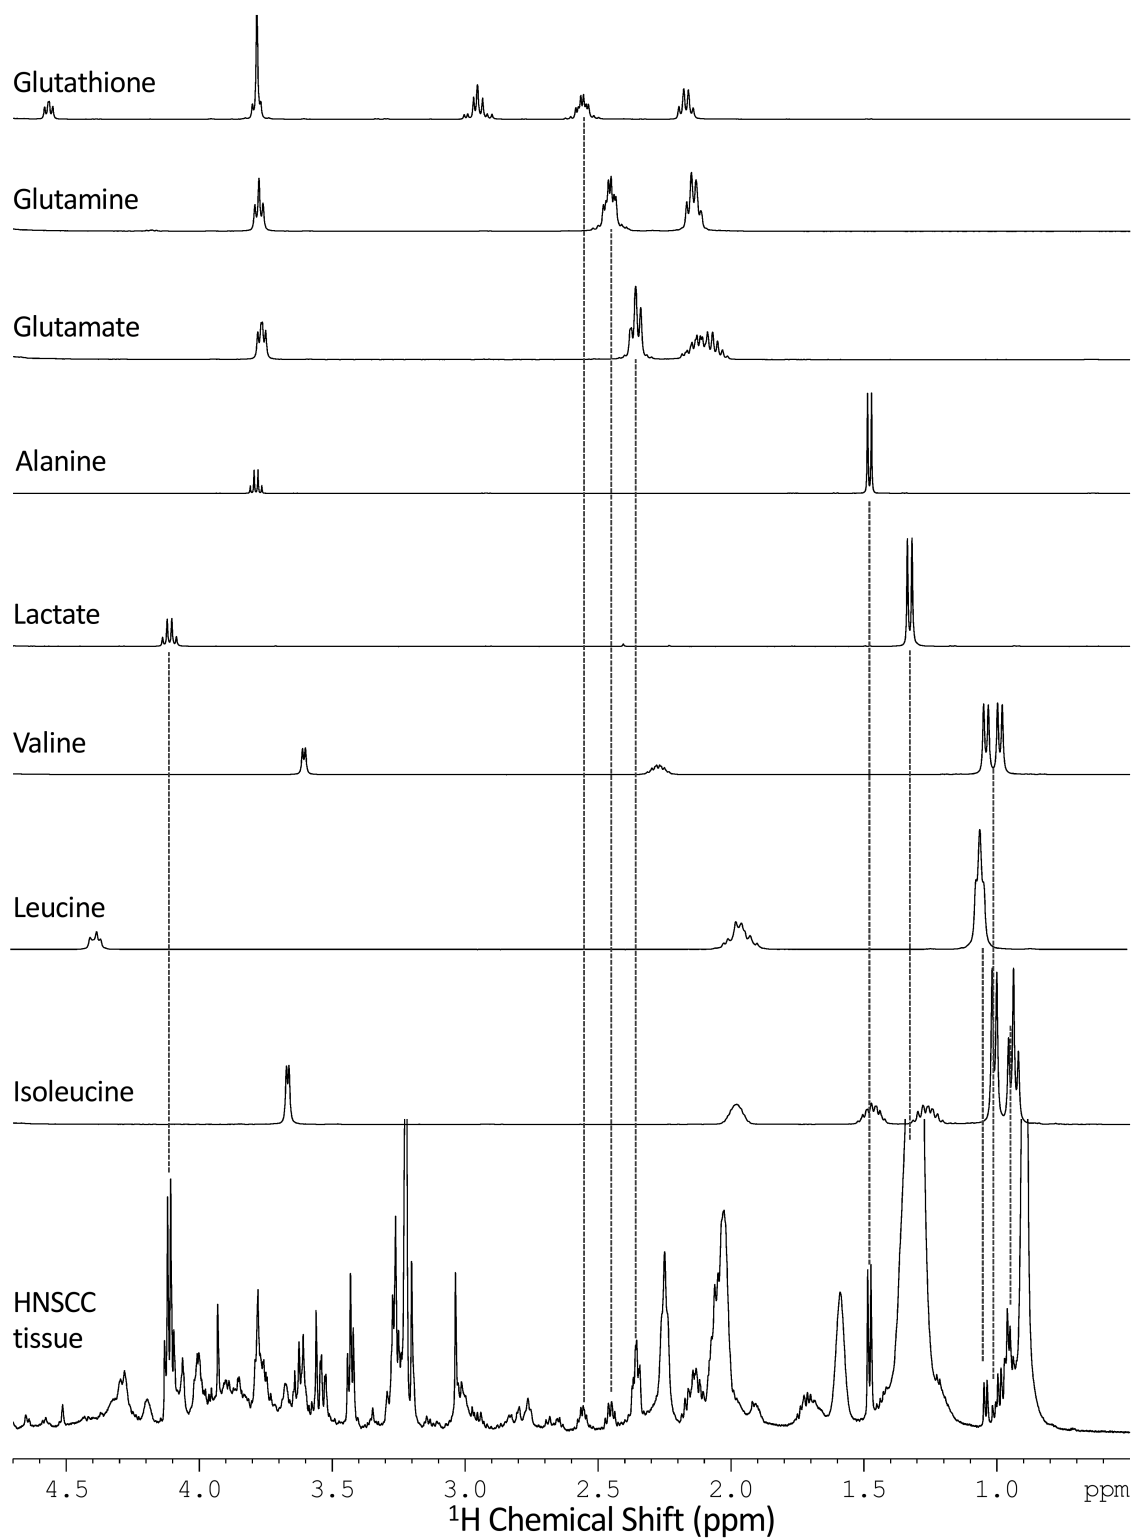

**Figure S2.** A comparison of NMR spectra of a tumor tissue with that of standard compounds to support the chemical shift assignments of aspartate, creatine, taurine, tyrosine and phenylalanine.

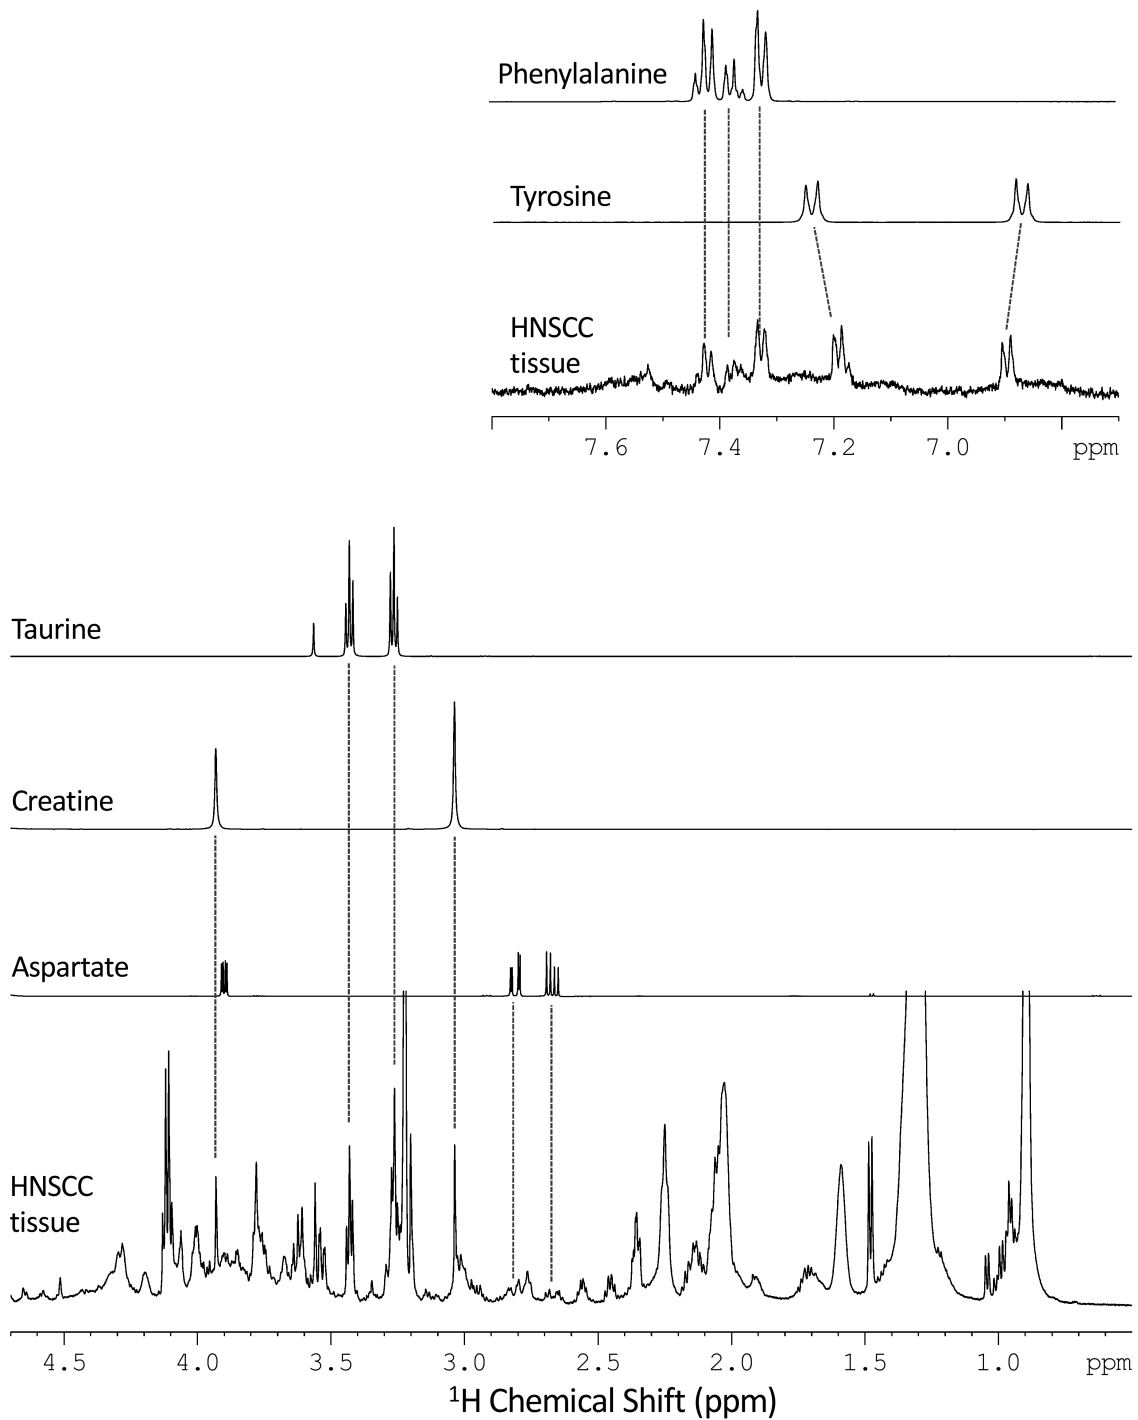

**Figure S3.** Average  $^1\text{H}$  HR-MAS CPMG spectra obtained from area normalized spectra of (A) normal adjacent tissues (15 tissues), (B) tumor (18 tissues) and (C) lymph-node metastatic (7 tissues) tissues. The intensity of peaks in the chemical shift region 6.7 – 8.5 ppm was increased equally in all spectra to show the low-abundant taurine and phenylalanine. Triglyceride signals are marked as 'TG'.

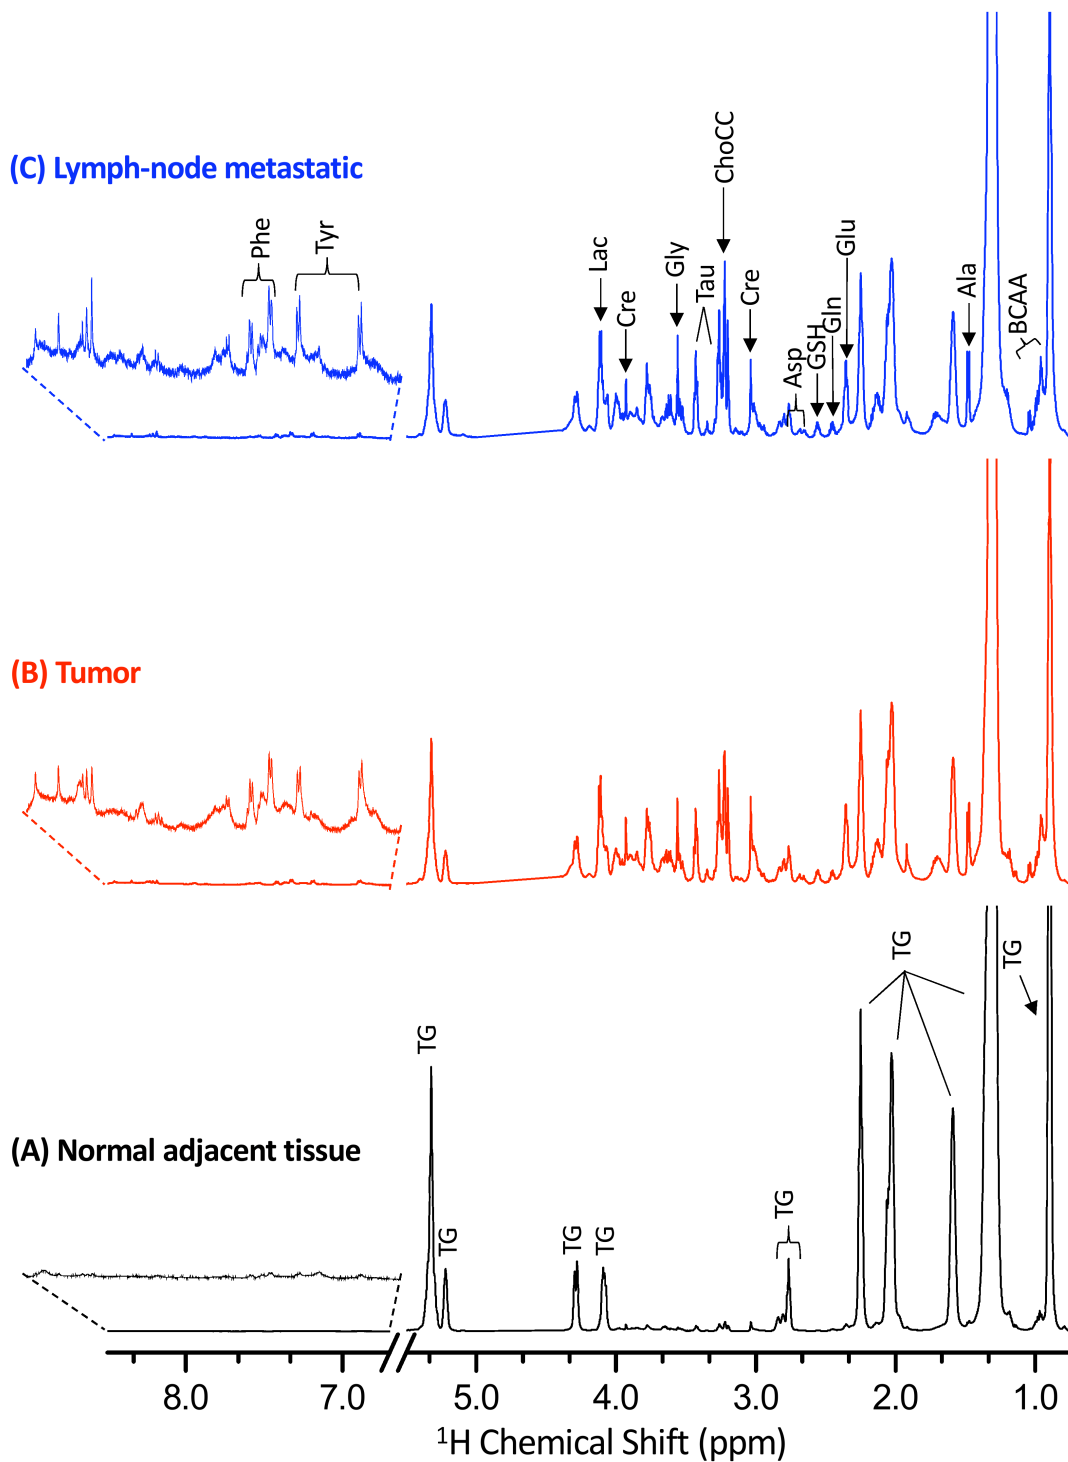

Supplement: NIHMS330534-supplement-1_si_001.pdf [file NIHMS330534-supplement-1_si_001.pdf]
